# Supplementary material for: Study of the Association between microRNA (miR-25T>C, miR-32C>A, miR-125C>T, and miR-222G>T) Polymorphisms and the Risk of Recurrent Pregnancy Loss in Korean Women
Source: PubMed Central journal article supplement (PMC7231175; doi:10.3390/genes11040354), 2020-03-26
Supplement: genes-11-00354-s001.pdf [file genes-11-00354-s001.pdf]

**Supplementary Table 1.** Allele combination analysis for miRNA polymorphisms in RPL patients and controls.

| Allele combinations                        | Overall<br>(2n=1266) | Controls<br>(2n=544) | RPL<br>(2n=722) | OR (95% CI)           | Pa-value     |
|--------------------------------------------|----------------------|----------------------|-----------------|-----------------------|--------------|
| miR-25T>C/miR-32C>A/miR-125aC>T/miR-222G>T |                      |                      |                 |                       |              |
| T-C-C-G                                    | 0.514                | 0.504                | 0.522           | 1.000 (reference)     |              |
| T-C-C-T                                    | 0.1641               | 0.1867               | 0.1473          | 0.755 (0.552 - 1.033) | 0.079        |
| T-C-T-G                                    | 0.0844               | 0.1035               | 0.0733          | 0.688 (0.458 - 1.033) | 0.070        |
| T-C-T-T                                    | 0.0239               | 0.0069               | 0.0328          | 4.361 (1.496 - 12.72) | <b>0.003</b> |
| T-A-C-G                                    | 0.0491               | 0.0492               | 0.048           | 0.942 (0.557 - 1.594) | 0.824        |
| T-A-C-T                                    | 0.022                | 0.024                | 0.0218          | 0.895 (0.423 - 1.891) | 0.770        |
| T-A-T-G                                    | 0.009                | 0.0066               | 0.0095          | 1.272 (0.369 - 4.389) | 0.768        |
| T-A-T-T                                    | 0.0008               | 0.0032               | 0               | 0.145 (0.007 - 3.044) | 0.178        |
| C-C-C-G                                    | 0.0627               | 0.0547               | 0.0681          | 1.187 (0.734 - 1.919) | 0.484        |
| C-C-C-T                                    | 0.0289               | 0.0289               | 0.0287          | 0.954 (0.489 - 1.862) | 0.890        |
| C-C-T-G                                    | 0.0205               | 0.0122               | 0.0268          | 1.973 (0.818 - 4.759) | 0.124        |
| C-C-T-T                                    | 0.0012               | 0.0037               | 0               | 0.145 (0.007 - 3.044) | 0.178        |
| C-A-C-G                                    | 0.0123               | 0.0125               | 0.0135          | 1.038 (0.39 - 2.762)  | 0.940        |
| C-A-C-T                                    | 0.0047               | 0.0021               | 0.0053          | 2.907 (0.323 - 26.17) | 0.406        |
| C-A-T-G                                    | 0.0024               | 0.0017               | 0.0006          | 0.242 (0.01 - 5.977)  | 0.241        |
| C-A-T-T                                    | 0                    | 0                    | 0.0024          | 3.636 (0.174 - 76.09) | 0.512        |
| miR-32C>A/miR-125aC>T/miR-222G>T           |                      |                      |                 |                       |              |
| C-C-G                                      | 0.5778               | 0.5591               | 0.5909          | 1.000 (reference)     |              |
| C-C-T                                      | 0.1923               | 0.2157               | 0.1748          | 0.767 (0.573 - 1.026) | 0.074        |
| C-T-G                                      | 0.1034               | 0.1142               | 0.0971          | 0.804 (0.554 - 1.166) | 0.249        |
| C-T-T                                      | 0.0262               | 0.0118               | 0.0361          | 3.085 (1.254 - 7.588) | <b>0.010</b> |
| A-C-G                                      | 0.0618               | 0.0616               | 0.0624          | 0.942 (0.589 - 1.506) | 0.804        |
| A-C-T                                      | 0.026                | 0.0258               | 0.0264          | 0.966 (0.477 - 1.957) | 0.924        |
| A-T-G                                      | 0.0114               | 0.0096               | 0.0114          | 1.139 (0.369 - 3.517) | 0.821        |
| A-T-T                                      | 0.0012               | 0.0023               | 0.0009          | 0.712 (0.044 - 11.43) | 1.000        |
| miR-25T>C/miR-125aC>T/miR-222G>T           |                      |                      |                 |                       |              |
| T-C-G                                      | 0.5623               | 0.5524               | 0.5688          | 1.000 (reference)     |              |
| T-C-T                                      | 0.1868               | 0.2113               | 0.1698          | 0.783 (0.583 - 1.052) | 0.104        |
| T-T-G                                      | 0.0936               | 0.1089               | 0.0832          | 0.745 (0.505 - 1.099) | 0.137        |
| T-T-T                                      | 0.0246               | 0.0116               | 0.0327          | 2.929 (1.183 - 7.257) | <b>0.015</b> |
| C-C-G                                      | 0.0756               | 0.0686               | 0.0812          | 1.168 (0.754 - 1.808) | 0.486        |
| C-C-T                                      | 0.0331               | 0.0298               | 0.0347          | 1.144 (0.6 - 2.181)   | 0.682        |
| C-T-G                                      | 0.0228               | 0.0146               | 0.0285          | 1.922 (0.84 - 4.4)    | 0.116        |
| C-T-T                                      | 0.0012               | 0.0028               | 0.001           | 0.366 (0.033 - 4.059) | 0.577        |
| miR-25T>C/miR-32C>A/miR-222G>T             |                      |                      |                 |                       |              |
| T-C-G                                      | 0.5982               | 0.6078               | 0.593           | 1.000 (reference)     |              |
| T-C-T                                      | 0.1881               | 0.1926               | 0.1823          | 0.972 (0.725 - 1.304) | 0.851        |
| T-A-G                                      | 0.0583               | 0.056                | 0.059           | 1.108 (0.681 - 1.806) | 0.679        |
| T-A-T                                      | 0.0226               | 0.0277               | 0.0202          | 0.773 (0.373 - 1.605) | 0.489        |
| C-C-G                                      | 0.0834               | 0.0661               | 0.0949          | 1.482 (0.966 - 2.274) | 0.070        |
| C-C-T                                      | 0.0299               | 0.0343               | 0.0287          | 0.855 (0.452 - 1.616) | 0.629        |
| C-A-G                                      | 0.0144               | 0.0146               | 0.0148          | 1.063 (0.423 - 2.674) | 0.896        |
| C-A-T                                      | 0.0049               | 0.0009               | 0.0071          | 8.51 (0.469 - 154.6)  | 0.073        |
| miR-25T>C/miR-32C>A/miR-125aC>T            |                      |                      |                 |                       |              |
| T-C-C                                      | 0.6785               | 0.6911               | 0.6684          | 1.000 (reference)     |              |
| T-C-T                                      | 0.1079               | 0.1099               | 0.1069          | 0.999 (0.695 - 1.437) | 0.996        |
| T-A-C                                      | 0.0713               | 0.0727               | 0.0706          | 0.993 (0.642 - 1.534) | 0.973        |
| T-A-T                                      | 0.0097               | 0.0105               | 0.0087          | 0.779 (0.249 - 2.434) | 0.666        |
| C-C-C                                      | 0.0911               | 0.0836               | 0.097           | 1.211 (0.813 - 1.803) | 0.345        |
| C-C-T                                      | 0.0223               | 0.0162               | 0.0266          | 1.643 (0.735 - 3.675) | 0.222        |
| C-A-C                                      | 0.017                | 0.0148               | 0.0185          | 1.265 (0.519 - 3.084) | 0.604        |
| C-A-T                                      | 0.0024               | 0.0013               | 0.0033          | 1.557 (0.141 - 17.25) | 1.000        |
| miR-125aC>T/miR-222G>T                     |                      |                      |                 |                       |              |
| C-G                                        | 0.6395               | 0.6211               | 0.6538          | 1.000 (reference)     |              |
| C-T                                        | 0.2183               | 0.241                | 0.2008          | 0.793 (0.602 - 1.043) | 0.097        |
| T-G                                        | 0.1149               | 0.1234               | 0.108           | 0.834 (0.584 - 1.189) | 0.315        |
| T-T                                        | 0.0273               | 0.0145               | 0.0374          | 2.417 (1.084 - 5.386) | <b>0.026</b> |
| miR-32C>A/miR-222G>T                       |                      |                      |                 |                       |              |
| C-G                                        | 0.6815               | 0.6729               | 0.6881          | 1.000 (reference)     |              |
| C-T                                        | 0.2182               | 0.2278               | 0.2108          | 0.903 (0.687 - 1.186) | 0.462        |
| A-G                                        | 0.0728               | 0.0716               | 0.0737          | 1.001 (0.648 - 1.546) | 0.997        |
| A-T                                        | 0.0275               | 0.0277               | 0.0275          | 0.982 (0.496 - 1.944) | 0.958        |

|                       |        |        |        |                       |  |       |
|-----------------------|--------|--------|--------|-----------------------|--|-------|
| miR-32C>A/miR-125aC>T |        |        |        |                       |  |       |
| C-C                   | 0.7698 | 0.7751 | 0.7657 | 1.000 (reference)     |  |       |
| C-T                   | 0.1298 | 0.1257 | 0.1332 | 1.077 (0.77 - 1.507)  |  | 0.663 |
| A-C                   | 0.088  | 0.0871 | 0.0889 | 1.039 (0.698 - 1.546) |  | 0.850 |
| A-T                   | 0.0123 | 0.0122 | 0.0122 | 0.981 (0.362 - 2.657) |  | 0.970 |
| miR-25T>C/miR-222G>T  |        |        |        |                       |  |       |
| T-G                   | 0.6563 | 0.6613 | 0.6525 | 1.000 (reference)     |  |       |
| T-T                   | 0.211  | 0.2229 | 0.202  | 0.922 (0.699 - 1.217) |  | 0.567 |
| C-G                   | 0.0981 | 0.0832 | 0.1093 | 1.342 (0.908 - 1.984) |  | 0.140 |
| C-T                   | 0.0346 | 0.0327 | 0.0362 | 1.104 (0.596 - 2.045) |  | 0.753 |
| miR-25T>C/miR-125aC>T |        |        |        |                       |  |       |
| T-C                   | 0.7496 | 0.7635 | 0.739  | 1.000 (reference)     |  |       |
| T-T                   | 0.1177 | 0.1207 | 0.1155 | 0.977 (0.69 - 1.384)  |  | 0.897 |
| C-C                   | 0.1082 | 0.0987 | 0.1155 | 1.217 (0.843 - 1.758) |  | 0.295 |
| C-T                   | 0.0245 | 0.0172 | 0.0299 | 1.9 (0.865 - 4.17)    |  | 0.104 |
| miR-25T>C/miR-32C>A   |        |        |        |                       |  |       |
| T-C                   | 0.7863 | 0.8008 | 0.7753 | 1.000 (reference)     |  |       |
| T-A                   | 0.081  | 0.0834 | 0.0793 | 0.986 (0.654 - 1.487) |  | 0.947 |
| C-C                   | 0.1134 | 0.0999 | 0.1236 | 1.283 (0.895 - 1.84)  |  | 0.174 |
| C-A                   | 0.0193 | 0.0159 | 0.0218 | 1.384 (0.606 - 3.163) |  | 0.439 |

RPL, recurrent pregnancy loss; OR, odds ratio; 95% CI, 95% confidence interval; N/A, not applicable; aFisher's exact test.

**Supplementary Table 2.** Genotype combination analysis for miRNA polymorphisms in RPL patients and controls

| Genotype combination | Control<br>(n=272) | RPL<br>(n=361) | COR (95% CI)          | P-<br>value | AOR (95% CI) <sup>a</sup> | Pa-<br>value |
|----------------------|--------------------|----------------|-----------------------|-------------|---------------------------|--------------|
| miR-25T>C            |                    |                |                       |             |                           |              |
| miR-32C>A            |                    |                |                       |             |                           |              |
| TT                   |                    | 216<br>(59.8)  | 1.000 (reference)     |             | 1.000 (reference)         |              |
|                      |                    |                |                       |             |                           |              |
|                      |                    | 17 (6.3)       | 1.094 (0.677 - 1.77)  | 0.714       | 1.095 (0.677 - 1.771)     | 0.712        |
|                      |                    | 0 (0)          | 0.543 (0.09 - 3.287)  | 0.506       | 0.548 (0.090 - 3.318)     | 0.512        |
| TC                   |                    | 70 (19.4)      | 1.358 (0.882 - 2.09)  | 0.164       | 1.363 (0.885 - 2.098)     | 0.160        |
|                      |                    | 11 (4)         | 1.259 (0.575 - 2.758) | 0.565       | 1.272 (0.580 - 2.788)     | 0.549        |
|                      |                    | 0 (0)          | N/A                   | N/A         | N/A                       | N/A          |
| CC                   |                    | 5 (1.4)        | 1.358 (0.32 - 5.761)  | 0.678       | 1.334 (0.314 - 5.671)     | 0.697        |
|                      |                    | 2 (0.7)        | 1.222 (0.202 - 7.396) | 0.827       | 1.288 (0.212 - 7.838)     | 0.784        |
|                      |                    | 0 (0)          | N/A                   | 0.994       | N/A                       | 0.994        |
| miR-25T>C            |                    |                |                       |             |                           |              |
| miR-125aC>T          |                    |                |                       |             |                           |              |
| TT                   |                    | 198<br>(54.8)  | 1.000 (reference)     |             | 1.000 (reference)         |              |
|                      |                    |                |                       |             |                           |              |
|                      |                    | 47 (17.3)      | 1.073 (0.696 - 1.653) | 0.751       | 1.087 (0.704 - 1.677)     | 0.707        |
|                      |                    | 6 (2.2)        | 0.678 (0.203 - 2.261) | 0.527       | 0.667 (0.199 - 2.231)     | 0.511        |
| TC                   |                    | 60 (16.6)      | 1.251 (0.795 - 1.969) | 0.333       | 1.259 (0.799 - 1.982)     | 0.321        |
|                      |                    | 14 (5.1)       | 1.452 (0.731 - 2.885) | 0.287       | 1.498 (0.752 - 2.987)     | 0.251        |
|                      |                    | 0 (0)          | N/A                   | 0.995       | N/A                       | 0.995        |
| CC                   |                    | 5 (1.4)        | 1.355 (0.319 - 5.757) | 0.680       | 1.367 (0.320 - 5.839)     | 0.673        |
|                      |                    | 2 (0.7)        | 1.626 (0.294 - 8.993) | 0.577       | 1.630 (0.293 - 9.07)      | 0.577        |
|                      |                    | 0 (0)          | N/A                   |             | N/A                       | N/A          |
| miR-25T>C            |                    |                |                       |             |                           |              |
| miR-222G>T           |                    |                |                       |             |                           |              |
| TT                   |                    | 152<br>(44.1)  | 1.000 (reference)     |             | 1.000 (reference)         |              |
|                      |                    |                |                       |             |                           |              |
|                      |                    | 81 (29.8)      | 0.984 (0.675 - 1.436) | 0.935       | 1.002 (0.685 - 1.464)     | 0.993        |
|                      |                    | 13 (4.8)       | 0.729 (0.321 - 1.655) | 0.450       | 0.736 (0.323 - 1.677)     | 0.466        |
| TC                   |                    | 47 (13)        | 1.325 (0.784 - 2.242) | 0.294       | 1.337 (0.788 - 2.269)     | 0.281        |
|                      |                    | 20 (7.4)       | 1.461 (0.806 - 2.646) | 0.212       | 1.477 (0.814 - 2.680)     | 0.199        |
|                      |                    | 5 (1.8)        | 0.474 (0.111 - 2.022) | 0.313       | 0.461 (0.108 - 1.972)     | 0.296        |
| CC                   |                    | 6 (1.7)        | 1.579 (0.387 - 6.444) | 0.524       | 1.545 (0.378 - 6.316)     | 0.545        |
|                      |                    | 2 (0.7)        | 0.79 (0.11 - 5.687)   | 0.815       | 0.878 (0.120 - 6.444)     | 0.898        |
|                      |                    | 0 (0)          | N/A                   | 0.994       | N/A                       | 0.994        |
| miR-32C>A            |                    |                |                       |             |                           |              |
| miR-125aC>T          |                    |                |                       |             |                           |              |

|             |            |               |               |                        |       |                        |       |
|-------------|------------|---------------|---------------|------------------------|-------|------------------------|-------|
| CC          | CC         | 164<br>(60.3) | 213 (59)      | 1.000 (reference)      |       | 1.000 (reference)      |       |
|             | CT         | 52 (19.1)     | 71 (19.7)     | 1.051 (0.697 - 1.587)  | 0.812 | 1.059 (0.701 - 1.599)  | 0.787 |
|             | TT         | 5 (1.8)       | 7 (1.9)       | 1.078 (0.336 - 3.458)  | 0.900 | 1.097 (0.341 - 3.526)  | 0.877 |
| CA          | CC         | 37 (13.6)     | 47 (13)       | 0.978 (0.607 - 1.575)  | 0.927 | 0.979 (0.608 - 1.577)  | 0.930 |
|             | CT         | 10 (3.7)      | 20 (5.5)      | 1.540 (0.702 - 3.379)  | 0.282 | 1.557 (0.707 - 3.429)  | 0.272 |
|             | TT         | 1 (0.4)       | 0 (0)         | N/A                    | 0.994 | N/A                    | 0.994 |
| AA          | CC         | 2 (0.7)       | 3 (0.8)       | 1.155 (0.191 - 6.992)  | 0.875 | 1.148 (0.189 - 6.963)  | 0.881 |
|             | CT         | 1 (0.4)       | 0 (0)         | N/A                    | 0.994 | N/A                    | 0.994 |
|             | TT         | 0 (0)         | 0 (0)         | N/A                    | N/A   | N/A                    | N/A   |
| miR-32C>A   | miR-222G>T |               |               |                        |       |                        |       |
| CC          | GG         | 123<br>(45.2) | 167<br>(46.3) | 1.000 (reference)      |       | 1.000 (reference)      |       |
|             | GT         | 86 (31.6)     | 113<br>(31.3) | 0.968 (0.672 - 1.394)  | 0.860 | 0.976 (0.678 - 1.407)  | 0.898 |
|             | TT         | 12 (4.4)      | 11 (3)        | 0.675 (0.288 - 1.581)  | 0.365 | 0.673 (0.287 - 1.576)  | 0.362 |
| CA          | GG         | 25 (9.2)      | 35 (9.7)      | 1.031 (0.587 - 1.812)  | 0.915 | 1.032 (0.588 - 1.814)  | 0.912 |
|             | GT         | 17 (6.3)      | 27 (7.5)      | 1.170 (0.611 - 2.241)  | 0.636 | 1.170 (0.610 - 2.245)  | 0.637 |
|             | TT         | 6 (2.2)       | 5 (1.4)       | 0.614 (0.183 - 2.057)  | 0.429 | 0.613 (0.183 - 2.056)  | 0.428 |
| AA          | GG         | 3 (1.1)       | 3 (0.8)       | 0.737 (0.146 - 3.711)  | 0.711 | 0.732 (0.145 - 3.692)  | 0.706 |
|             | GT         | 0 (0)         | 0 (0)         | N/A                    | N/A   | N/A                    | N/A   |
|             | TT         | 0 (0)         | 0 (0)         | N/A                    | N/A   | N/A                    | N/A   |
| miR-125aC>T | miR-222G>T |               |               |                        |       |                        |       |
| CC          | GG         | 160<br>(58.8) | 150<br>(41.6) | 1.000 (reference)      |       | 1.000 (reference)      |       |
|             | GT         | 80 (29.4)     | 102<br>(28.3) | 0.901 (0.614 - 1.323)  | 0.595 | 0.914 (0.621 - 1.343)  | 0.646 |
|             | TT         | 17 (6.3)      | 11 (3)        | 0.457 (0.206 - 1.016)  | 0.055 | 0.458 (0.206 - 1.017)  | 0.055 |
| CT          | GG         | 41 (15.1)     | 52 (14.4)     | 0.896 (0.555 - 1.447)  | 0.654 | 0.901 (0.558 - 1.456)  | 0.671 |
|             | GT         | 21 (7.7)      | 34 (9.4)      | 1.144 (0.629 - 2.081)  | 0.659 | 1.156 (0.631 - 2.117)  | 0.639 |
|             | TT         | 1 (0.4)       | 5 (1.4)       | 3.533 (0.407 - 30.682) | 0.252 | 3.627 (0.417 - 31.557) | 0.243 |
| TT          | GG         | 4 (1.5)       | 3 (0.8)       | 0.530 (0.116 - 2.417)  | 0.412 | 0.543 (0.118 - 2.498)  | 0.433 |
|             | GT         | 2 (0.7)       | 4 (1.1)       | 1.413 (0.254 - 7.858)  | 0.693 | 1.369 (0.245 - 7.635)  | 0.721 |
|             | TT         | 0 (0)         | 0 (0)         | N/A                    | N/A   | N/A                    | N/A   |

RPL, recurrent pregnancy loss; SNP, single nucleotide polymorphism; COR, crude odds ratio; AOR, adjusted odds ratio; 95% CI, 95% confidence interval; N/A, not applicable.

a Adjusted by age of participants.

**Supplementary Table 3.** Association between various clinical parameters and miRNA gene polymorphisms in RPL patients.

| Patients    |             |                          |                               |                              |           |            |              |                |                           |                   |              |
|-------------|-------------|--------------------------|-------------------------------|------------------------------|-----------|------------|--------------|----------------|---------------------------|-------------------|--------------|
| Genotypes   | Age (years) | BMI (kg/m <sup>2</sup> ) | Previous pregnancy losses (n) | Mean gestational age (weeks) | PT (sec)  | aPTT (sec) | PLT (103/ul) | Folate (mg/ml) | Total cholesterol (mg/dl) | Uric acid (mg/dl) | BUN (mg/dl)  |
|             | (361)       | (332)                    | (361)                         | (174)                        | (59)      | (200)      | (194)        | (207)          | (170)                     | (167)             | (188)        |
| miR-25T>C   |             |                          |                               |                              |           |            |              |                |                           |                   |              |
| TT          | 32.7±3.81   | 21.5±4.34                | 3±1.6                         | 7.6±2.08                     | 11.6±0.85 | 32.5±4.48  | 253.9±54.71  | 14.8±13.49     | 189.9±51.96               | 3.9±0.89          | 10.1±2.77    |
| TC          | 31.9±4.1    | 21.4±2.53                | 3±1.35                        | 6.7±1.37                     | 11.5±0.93 | 31.4±4.1   | 259.8±60.24  | 13±8.06        | 177.7±38.61               | 3.6±0.66          | 9.2±2.32     |
| CC          | 33.8±5.04   | 21.8±2.31                | 2.8±1.3                       | 7.5±1.78                     | 11.3±0.82 | 32.6±3.77  | 238.6±54.21  | 12.5±6.16      | 201.6±63.85               | 3.6±1.07          | 8.1±2.37     |
| P           | 0.123       | 0.921                    | 0.826                         | 0.051                        | 0.469     | 0.278      | 0.668        | 0.635          | 0.304                     | 0.160             | <b>0.049</b> |
| miR-32C>A   |             |                          |                               |                              |           |            |              |                |                           |                   |              |
| CC          | 32.6±3.91   | 21.4±4.22                | 3.1±1.54                      | 7.5±2.07                     | 11.6±0.88 | 32.5±4.56  | 256±55.54    | 15±13.13       | 185.1±48.11               | 3.7±0.86          | 9.9±2.82     |
| CA          | 32.1±3.97   | 21.9±2.22                | 2.7±1.48                      | 6.9±1.33                     | 11.4±0.85 | 31.4±3.69  | 252.1±58.27  | 11.4±6.62      | 194.4±54.75               | 4±0.79            | 10±1.99      |
| AA          | 34±5        | 20.1±3.39                | 2                             | 9±1.41                       | 11.8±0.21 | 33.7±1.63  | 223±31.11    | 15.1±8.61      | 185±9.9                   | 3.2±1.41          | 6.3±2.34     |
| P           | 0.534       | 0.554                    | 0.102                         | 0.118                        | 0.411     | 0.283      | 0.668        | 0.258          | 0.597                     | 0.215             | 0.065        |
| miR-125aC>T |             |                          |                               |                              |           |            |              |                |                           |                   |              |
| CC          | 32.9±3.81   | 21.4±3.38                | 3.1±1.60                      | 7.4±2.05                     | 11.6±0.82 | 32±4.48    | 254.4±52.57  | 14±11.98       | 187.4±48.49               | 3.8±0.85          | 9.6±2.67     |
| CT          | 31.8±4.02   | 21.8±5.15                | 2.9±1.36                      | 7.2±1.53                     | 11.6±1.02 | 33.2±3.84  | 251.3±60.4   | 15.3±13.31     | 184.6±50.46               | 3.8±0.75          | 10.6±2.67    |
| TT          | 31±5.51     | 20.1±4.25                | 2.9±0.90                      | 5                            | 10.6      | 24.9       | 376±66.47    | 12.9±3.79      | 215.3±76.14               | 4.9±2.76          | 8.4±2.32     |
| P           | <b>0.04</b> | 0.473                    | 0.537                         | 0.409                        | 0.498     | 0.068      | <b>0.008</b> | 0.794          | 0.578                     | 0.905             | 0.062        |
| miR-222G>T  |             |                          |                               |                              |           |            |              |                |                           |                   |              |
| GG          | 32.8±4.14   | 21.6±3.25                | 3±1.47                        | 7.5±1.97                     | 11.6±0.87 | 31.8±4.54  | 258.8±58.07  | 14±8.3         | 184.3±50.45               | 3.9±0.91          | 9.5±2.62     |
| GT          | 32.4±3.64   | 21.4±4.83                | 3±1.6                         | 7.3±1.98                     | 11.5±0.85 | 32.8±4.05  | 250.6±52.18  | 15±16.52       | 188.6±49.03               | 3.6±0.78          | 10.3±2.72    |
| TT          | 31.3±3.36   | 20.9±2.15                | 3.6±1.63                      | 6.9±1.25                     | 11.9±1.05 | 33.6±4.93  | 240.5±60.32  | 10.4±5.2       | 203.7±40.95               | 3.8±0.46          | 9.9±2.92     |
| P           | 0.254       | 0.807                    | 0.315                         | 0.667                        | 0.522     | 0.246      | 0.471        | 0.666          | 0.506                     | 0.054             | 0.143        |

Data are presented as the mean ± standard deviation (SD). BMI; body mass index; PT, prothrombin time; aPTT, activated partial thromboplastin time; PLT, platelets; BUN, blood urea nitrogen.

**Supplementary Table 3. (continued)**

| Genotypes             | Creatinine (mg/dl) | E2 (Basal) | TSH (mU/l) | FSH (mU/l) | LH (mU/l) | Prolactin (ng/ml) | HDL (mg/dl)  | Hct (%)   | Hcy      |
|-----------------------|--------------------|------------|------------|------------|-----------|-------------------|--------------|-----------|----------|
|                       | (187)              | (158)      | (201)      | (187)      | (188)     | (197)             | (17)         | (193)     | (264)    |
| <b>miR-25T&gt;C</b>   |                    |            |            |            |           |                   |              |           |          |
| TT                    | 0.7±0.12           | 37±32.03   | 2.3±1.6    | 7.9±12.28  | 6.6±14.23 | 15.7±12.79        | 55.1±15.14   | 37.4±3.34 | 6.9±2.16 |
| TC                    | 0.7±0.12           | 30.7±19.32 | 2.1±1.52   | 6±3.86     | 5.7±4.75  | 17±14.61          | 86.2±14.06   | 37.5±3.5  | 7.1±2.09 |
| CC                    | 0.6±0.16           | 34.1±21.57 | 1.4±0.29   | 7.4±2.87   | 6.4±4.31  | 10.1±0.54         | 63.3±4.24    | 35.8±3.4  | 5.9±1.17 |
| P                     | <b>0.014</b>       | 0.517      | 0.539      | 0.577      | 0.905     | 0.681             | <b>0.017</b> | 0.562     | 0.351    |
| <b>miR-32C&gt;A</b>   |                    |            |            |            |           |                   |              |           |          |
| CC                    | 0.7±0.12           | 32.8±23.98 | 2.3±1.6    | 7.7±11.83  | 6.7±13.72 | 16.2±13.99        | 60.9±17.86   | 37.3±3.52 | 7±2.2    |
| CA                    | 0.7±0.13           | 48.1±45.66 | 2±1.42     | 6±2.77     | 4.8±3     | 14.8±9.36         | 66.3±27.37   | 37.5±2.92 | 6.7±1.77 |
| AA                    | 0.6±0.06           | 27.9       | N/A        | 5.7        | 4.6       | N/A               | N/A          | 37.9±1.06 | 6±2.27   |
| P                     | <b>0.026</b>       | 0.139      | 0.349      | 0.689      | 0.695     | 0.555             | 0.711        | 0.95      | 0.458    |
| <b>miR-125aC&gt;T</b> |                    |            |            |            |           |                   |              |           |          |
| CC                    | 0.7±0.12           | 34.5±31.45 | 2.1±1.41   | 8.1±12.45  | 6.8±14.43 | 14.9±10.98        | 65.9±19.09   | 37.2±3.43 | 7±2.12   |
| CT                    | 0.7±0.11           | 36.7±22.34 | 2.4±2      | 5.6±2.69   | 4.9±3.26  | 19.3±18.1         | 51.2±11.06   | 37.8±3.16 | 6.7±2.19 |
| TT                    | 0.7±0.26           | 55.1±14.38 | 2.4±0.52   | 5.5±2.27   | 7.5±6.47  | 11.8±3.9          | N/A          | 36.6±5.37 | 6.2±1.9  |
| P                     | 0.891              | 0.469      | 0.539      | 0.368      | 0.656     | 0.286             | 0.130        | 0.509     | 0.413    |
| <b>miR-222G&gt;T</b>  |                    |            |            |            |           |                   |              |           |          |
| GG                    | 0.7±0.13           | 35.3±26.83 | 2.2±1.6    | 7.5±11.7   | 5.7±7.22  | 15.9±12.11        | 59.1±23.2    | 37.6±3.47 | 6.8±2.23 |
| GT                    | 0.7±0.12           | 32.4±20.82 | 2.2±1.58   | 7.4±9.68   | 7.3±17.31 | 16.4±14.96        | 65.4±16.46   | 37.1±3.21 | 7±1.9    |
| TT                    | 0.7±0.11           | 79.1±94.92 | 2.3±0.55   | 5.2±2.08   | 3.8±2.29  | 11.8±3.66         | 51.8±6.86    | 36.7±3.75 | 7.5±2.77 |
| P                     | 0.178              | 0.414      | 0.972      | 0.896      | 0.622     | 0.709             | 0.610        | 0.551     | 0.524    |

Data are presented as the mean ± standard deviation (SD). E2, estradiol; TSH, thyroid-stimulating hormone; FSH, follicle-stimulating hormone; LH, luteinizing hormone; HDL, high-density lipoprotein; Hct, hematocrit; Hcy, homocysteine;
